# Supplementary material for: Use of CuO encapsulated in mesoporous silica SBA-15 as a recycled catalyst for allylic C–H bond oxidation of cyclic olefins at room temperature
Source: Royal Society of Chemistry journal article supplement (doi:10.1039/c7ra02995k), 2017-01-01
Supplement: c7ra02995k1.pdf [file c7ra02995k1.pdf]

# Use of CuO encapsulated in mesoporous silica SBA-15 as recycled catalyst for allylic C–H bond oxidation of cyclic olefins at room temperature

Saadi Samadi<sup>\*a, b</sup>, Akram Ashouri<sup>a</sup>, Mehdi Ghambarian<sup>c</sup>

<sup>a</sup>Laboratory of Asymmetric Synthesis, Department of Chemistry, Faculty of Science, University of Kurdistan, Zip Code 66177-15175, Sanandaj, Iran. E-mail: s.samadi@uok.ac.ir

<sup>b</sup>Research Centre of Nanotechnology, University of Kurdistan, P.O. Box 416, Sanandaj, Iran

<sup>c</sup>Gas Conversion Department, Faculty of Petrochemicals, Iran Polymer and Petrochemical Institute, P.O. Box 14975-112, Tehran, Iran

| Page | List of contents                                                                   |
|------|------------------------------------------------------------------------------------|
| S1   | Title, author's name, address                                                      |
| S2   | Typical procedure for preparation of SBA-15                                        |
| S3   | SEM of SBA-15                                                                      |
| S4   | EDX spectrum of SBA-15                                                             |
| S5   | Typical procedure for functionalization of SBA-15 by 3-aminopropyltrimethoxysilane |
| S6   | SEM of NH <sub>2</sub> -SBA-15                                                     |
| S7   | EDX spectrum of NH <sub>2</sub> -SBA-15                                            |
| S8   | SEM of Cu-SBA-15                                                                   |
| S9   | EDX spectrum of Cu-SBA-15                                                          |
| S10  | SEM of Cu-N-SBA-15                                                                 |
| S11  | Elemental mapping of the Cu-N-SBA-15 catalysts                                     |
| S12  | Mix elemental mapping of the Cu-N-SBA-15 catalysts                                 |
| S13  | EDX spectrum of N-Cu-SBA-15                                                        |
| S14  | Typical procedure for synthesis of <i>tert</i> -butyl 4-nitrobenzoperoxoate        |
| S15  | IR of 1                                                                            |
| S16  | <sup>1</sup> H NMR of 1                                                            |
| S17  | IR of 2                                                                            |
| S18  | <sup>1</sup> H NMR of 2                                                            |
| S19  | IR of 3                                                                            |
| S20  | <sup>1</sup> H NMR of 3                                                            |
| S21  | <sup>13</sup> C NMR of 3                                                           |
| S22  | <sup>1</sup> H NMR of 4                                                            |
| S23  | FT-IR of 4                                                                         |
| S24  | <sup>1</sup> H NMR of 5                                                            |
| S25  | References                                                                         |

### ***1. Typical procedure for preparation of SBA-15***

Mesoporous silica SBA-15 was prepared by a method that described in the literature. 2.0 g Pluronic P123 (Poly(ethylene glycol)-block-Poly(ethylene glycol)-block-Poly(ethylene glycol)-block) copolymer as a surfactant was dissolved in 46 mL deionized water with 10ml concentrated HCl in a capped 100 mL Erlenmeyer flask at room temperature. After complete copolymer dissolution (0.5-1h), solution of TEOS as a source of Si (4.6 gr) in deionized water was added and the solution was stirred vigorously at 40 °C for 15 min, The solution was stirred for an additional 10 minutes and Finally the mixture transferred into a stainless steel jacketed Teflon vessel and heated at 100°C for 48 h. the mixture was cooled to room temperature and solid product was separated by filtration followed by washing with deionized water until pH=7-8 was achieved. Finally dried at 60°C . Template removal was performed by calcination at 823 K for 6h. the XRD, SEM, BET, EDX and FT-IR results clearly demonstrated that the mesoporous structure of SBA-15 [1].

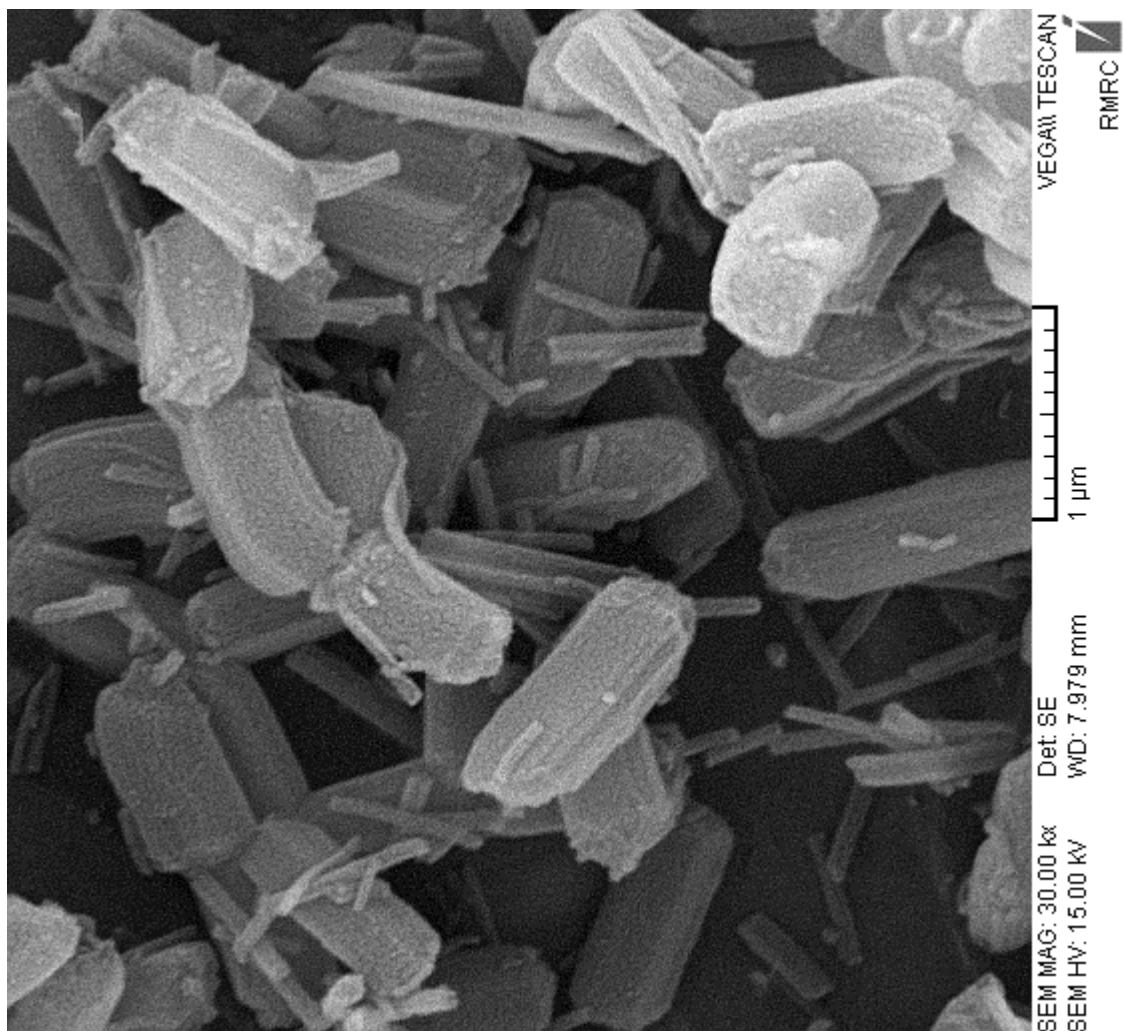

Scanning electron micrograph of SBA-15

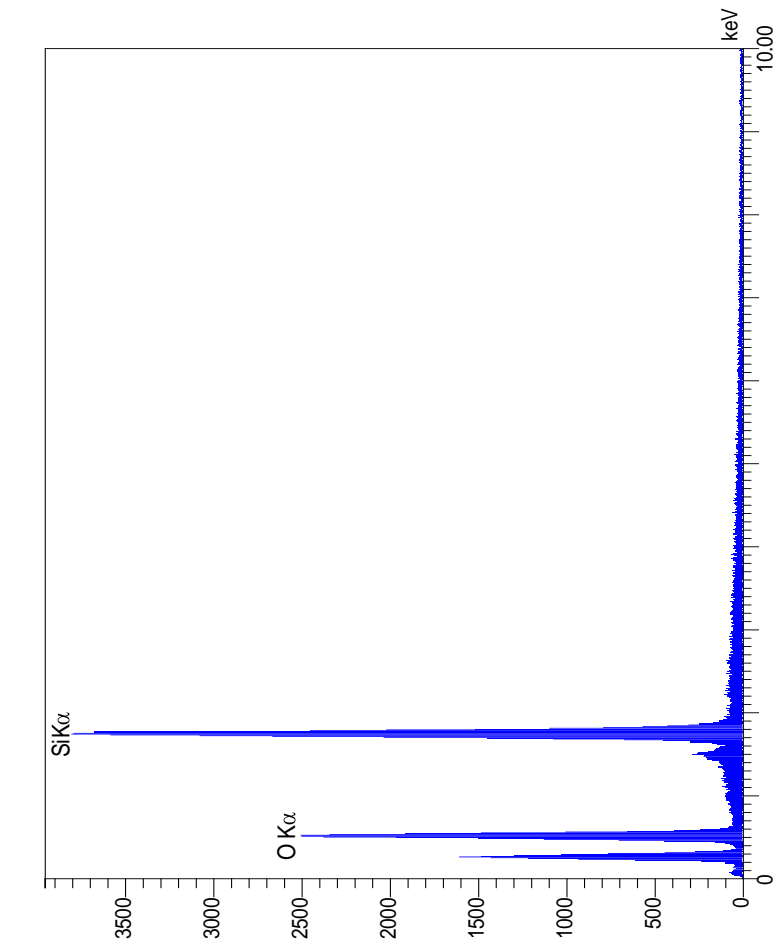

EDX spectrum of the SBA-15

## ***2. Typical procedure for Functionalization of SBA-15 by 3-Aminopropyltrimethoxysilane***

Surface modification of SBA-15 was performed corresponding to the literature. Briefly, the dry mesoporous silica materials (1g) were dispersed in 50 mL of dry toluene, then 2 mL of 3-Aminopropyltrimethoxysilane was added. The resulting mixture was refluxed under nitrogen atmosphere for 24 h. The modified nonporous were collected by filtration and washed thoroughly with  $\text{CH}_2\text{Cl}_2/\text{CH}_3\text{OH}$ . Then soxhlet for 24h with  $\text{CH}_2\text{Cl}_2/\text{CH}_3\text{OH}$  (1:1) to remove any untethered species then the white solid  $\text{NH}_2$ - SBA-15 dried at room temperature [2].

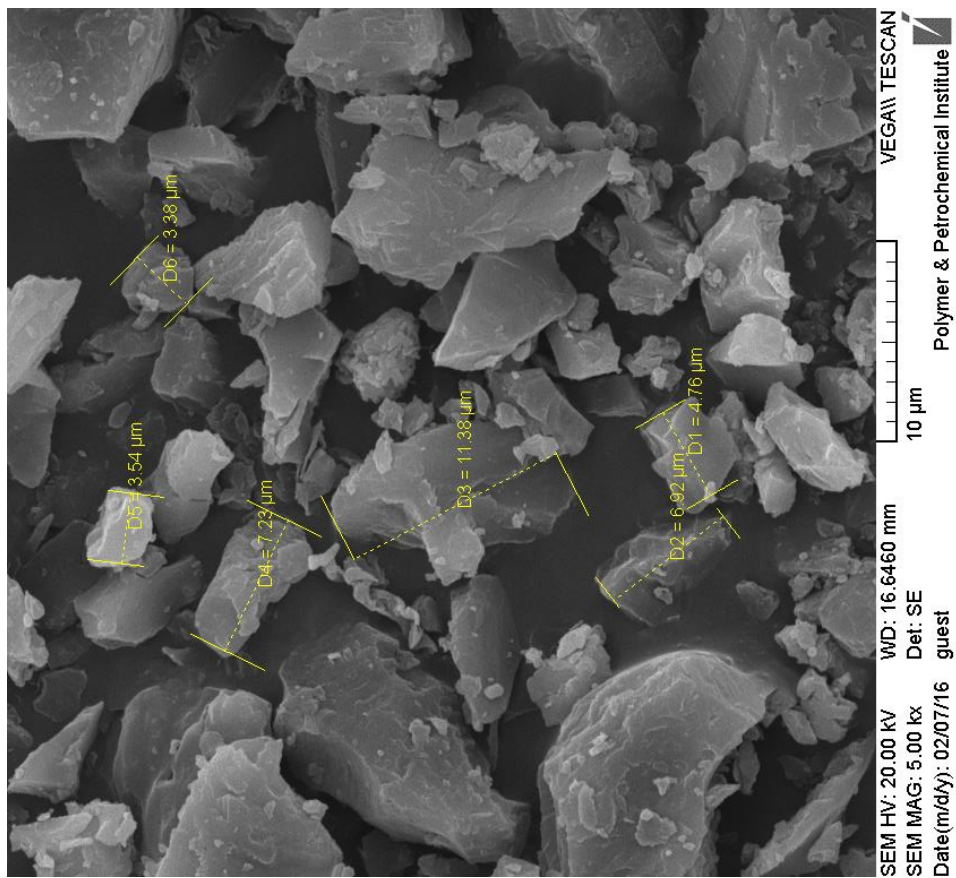

Scanning electron micrograph of NH<sub>2</sub>-SBA-15

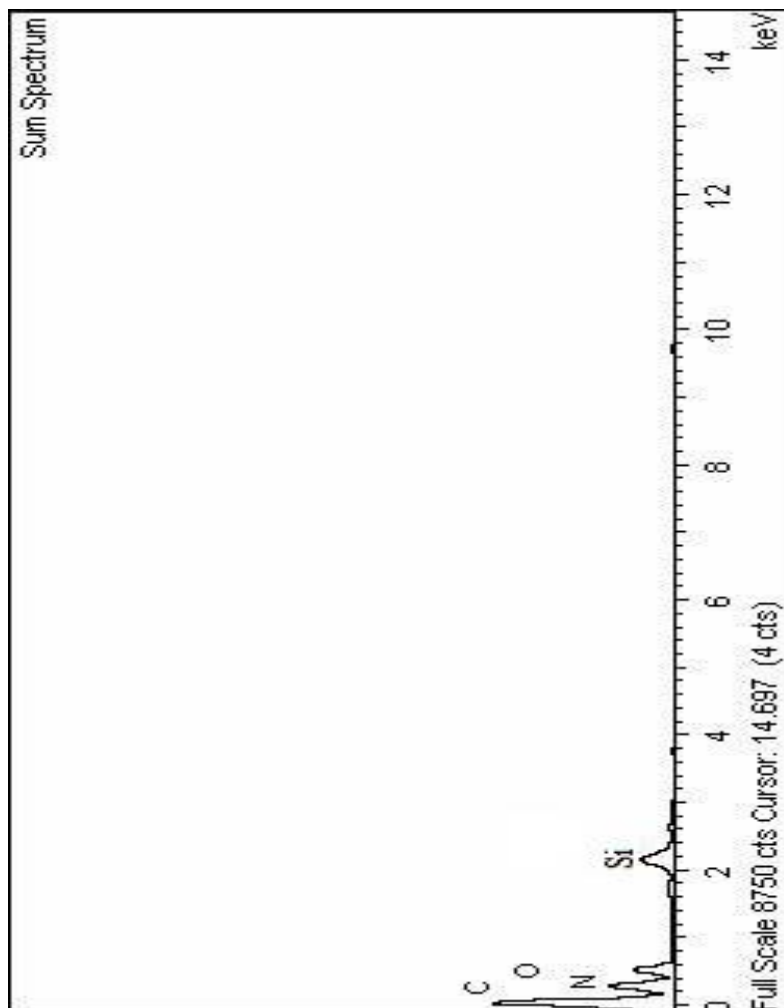

EDX spectrum of NH<sub>2</sub>-SBA-15

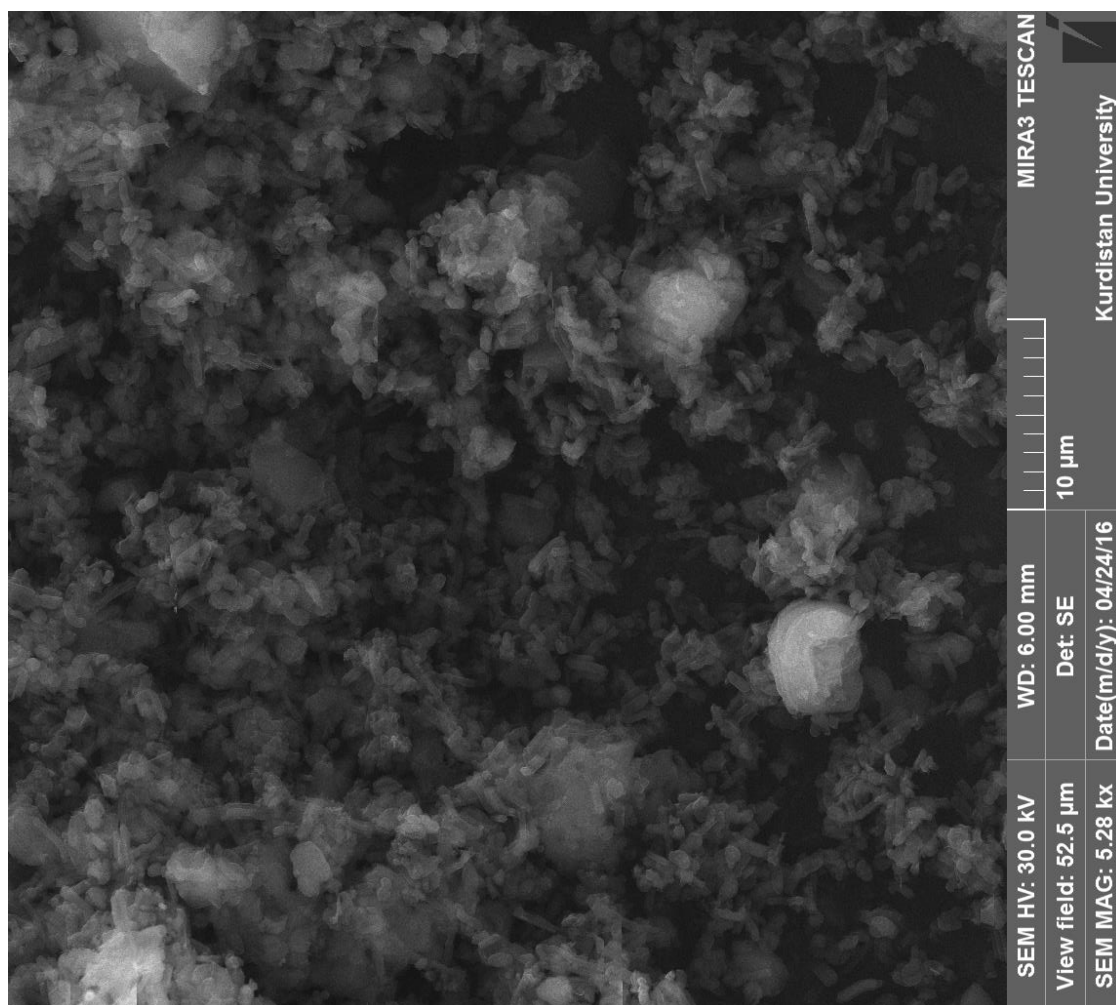

Scanning electron micrograph of Cu-SBA-15



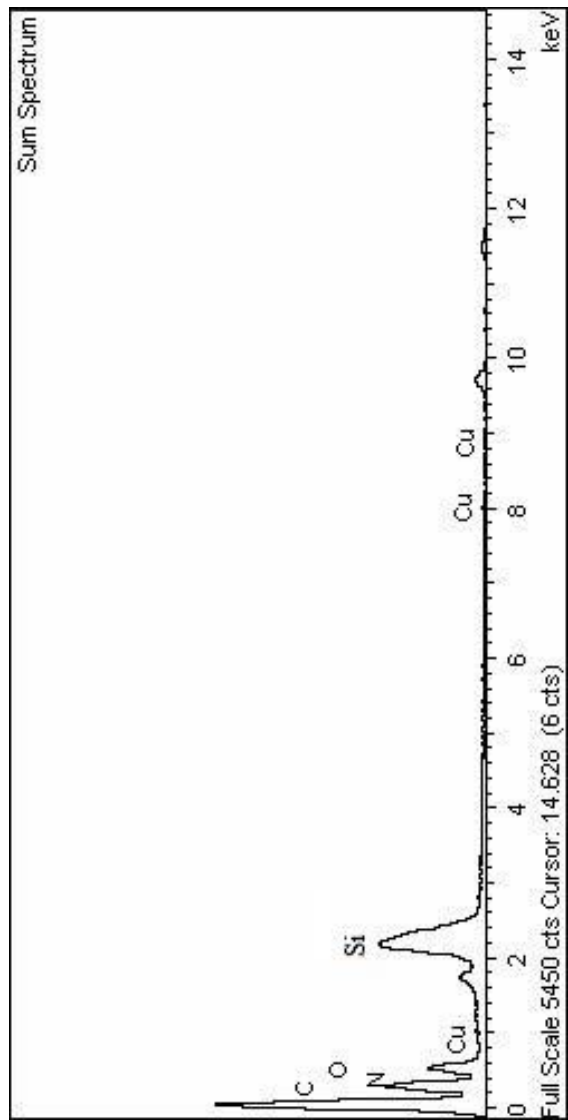

EDX spectrum of the Cu-SBA-15

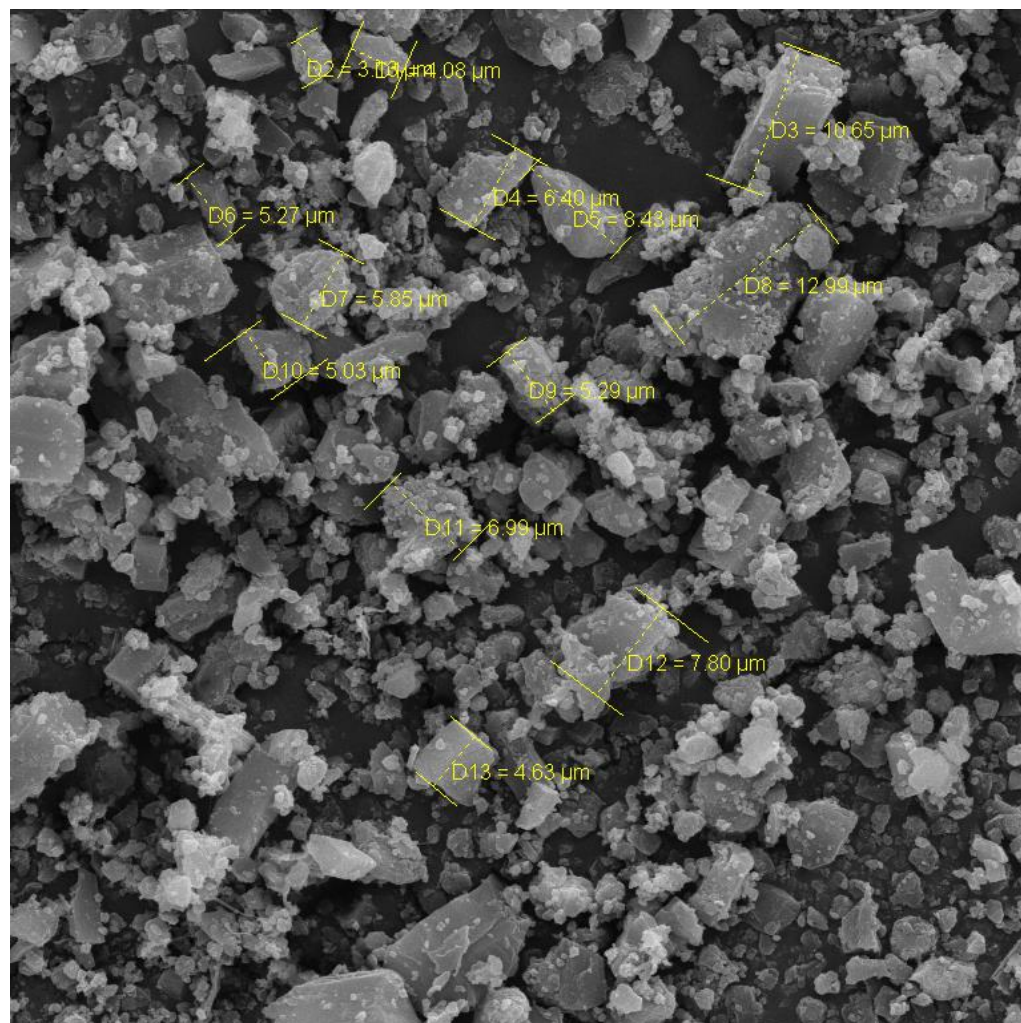

SEM HV: 20.00 kV  
SEM MAG: 3.00 kx  
Date(m/d/y): 02/07/16

WD: 16.6470 mm  
Det: SE  
guest

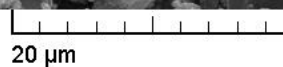

VEGA\\ TESCAN

Polymer & Petrochemical Institute

Scanning electron micrograph of Cu-N- SBA-15

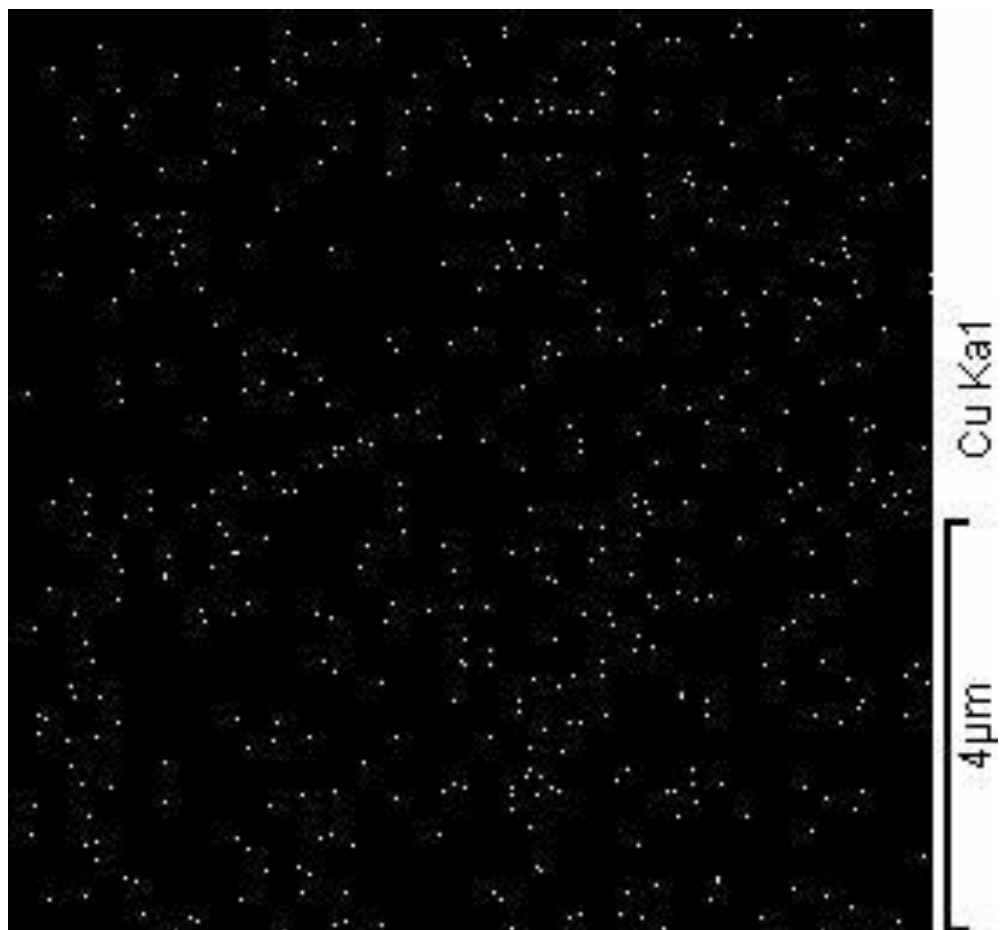

**Elemental mapping of the Cu-N-SBA-15 catalyst**

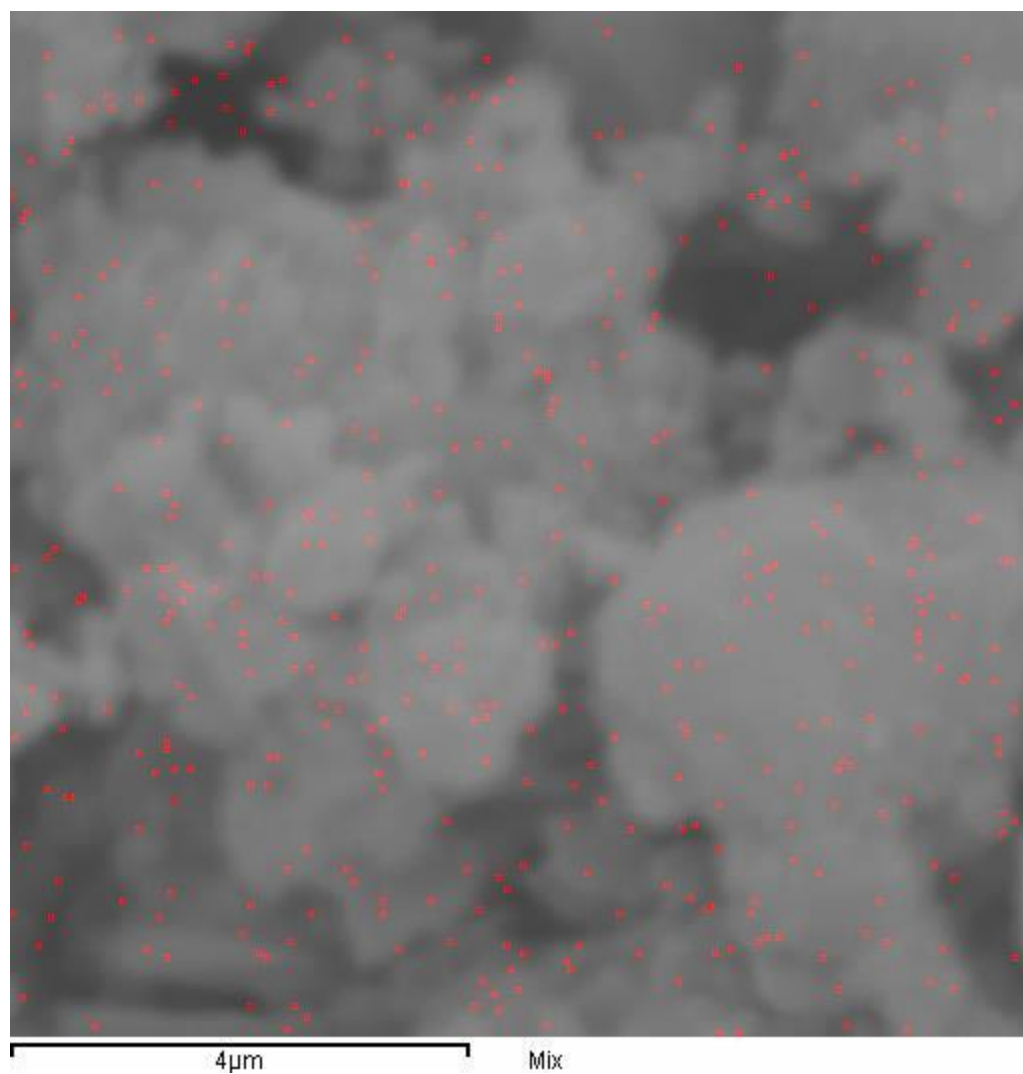

**Mix elemental mapping of the Cu-N-SBA-15 catalyst**

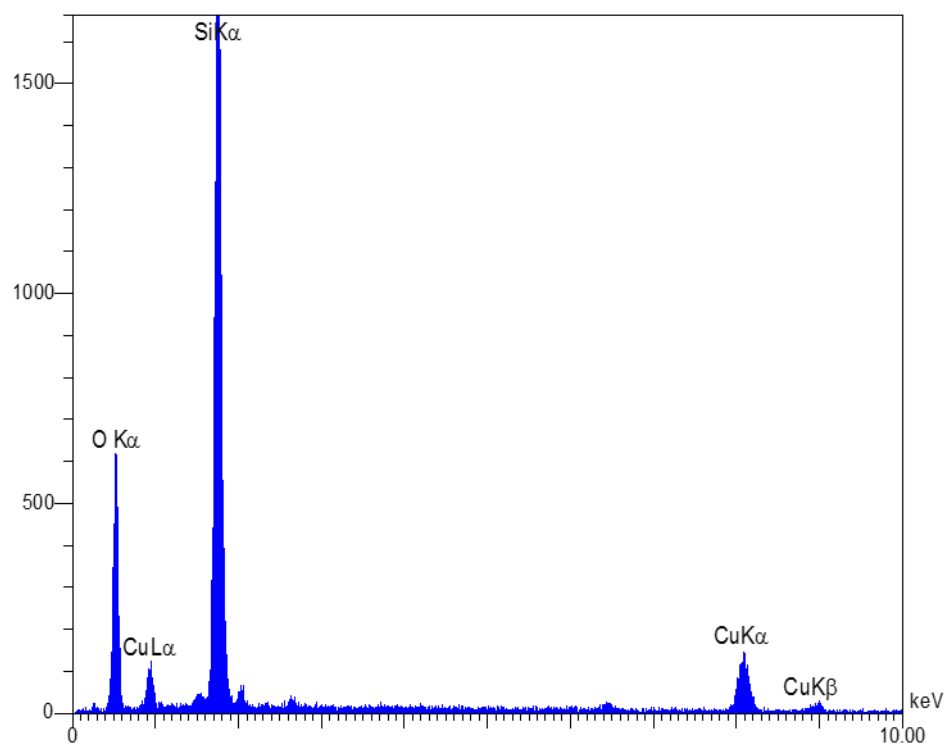

**EDX spectrum of the N- Cu-SBA-15**

### ***3. Typical procedure for Synthesis of tert-butyl 4-nitrobenzoperoxoate 1:***

*p*-nitrobenzoyl chloride (3.2 g, 17.2 mmol) was dissolved in a 100 mL round bottom flask containing CH<sub>2</sub>Cl<sub>2</sub> (35 mL). The solution was cooled to -20 °C and stirred under nitrogen for 15 min. Pyridine (1.7 mL, 20.0 mmol) was added and the reaction mixture was stirred for 10 min. Then, *tert*-butyl hydroperoxide (3.5 mL, 20.0 mmol) was added dropwise to the reaction at -20 °C, and stirred for 4 h. Then the reaction solution was diluted with CH<sub>2</sub>Cl<sub>2</sub> (20 mL), and washed with water. The organic layer was separated, dried over MgSO<sub>4</sub>, and evaporated to obtain crude yellow solid product. Purification using flash chromatography (90:10; n-hexane: EtOAc) afforded the light yellow solid product **1**. (3.9 g, 98% yield) [3, 4].

*Tert-butyl 4-nitrobenzoperoxoate (1)*: Mp: 74-76 °C (lit. 75-78 °C (ref. 3)); <sup>1</sup>H NMR (300 MHz, CDCl<sub>3</sub>): δ<sub>H</sub> (ppm) = 1.45 (9H, s, Me), 8.17-8.40 (4H, m, Ar). <sup>13</sup>C NMR (75 MHz, CDCl<sub>3</sub>): δ<sub>C</sub> (ppm) = 26.7, 84.5, 124.1, 131.3, 133.9, 150.6, 163.0.

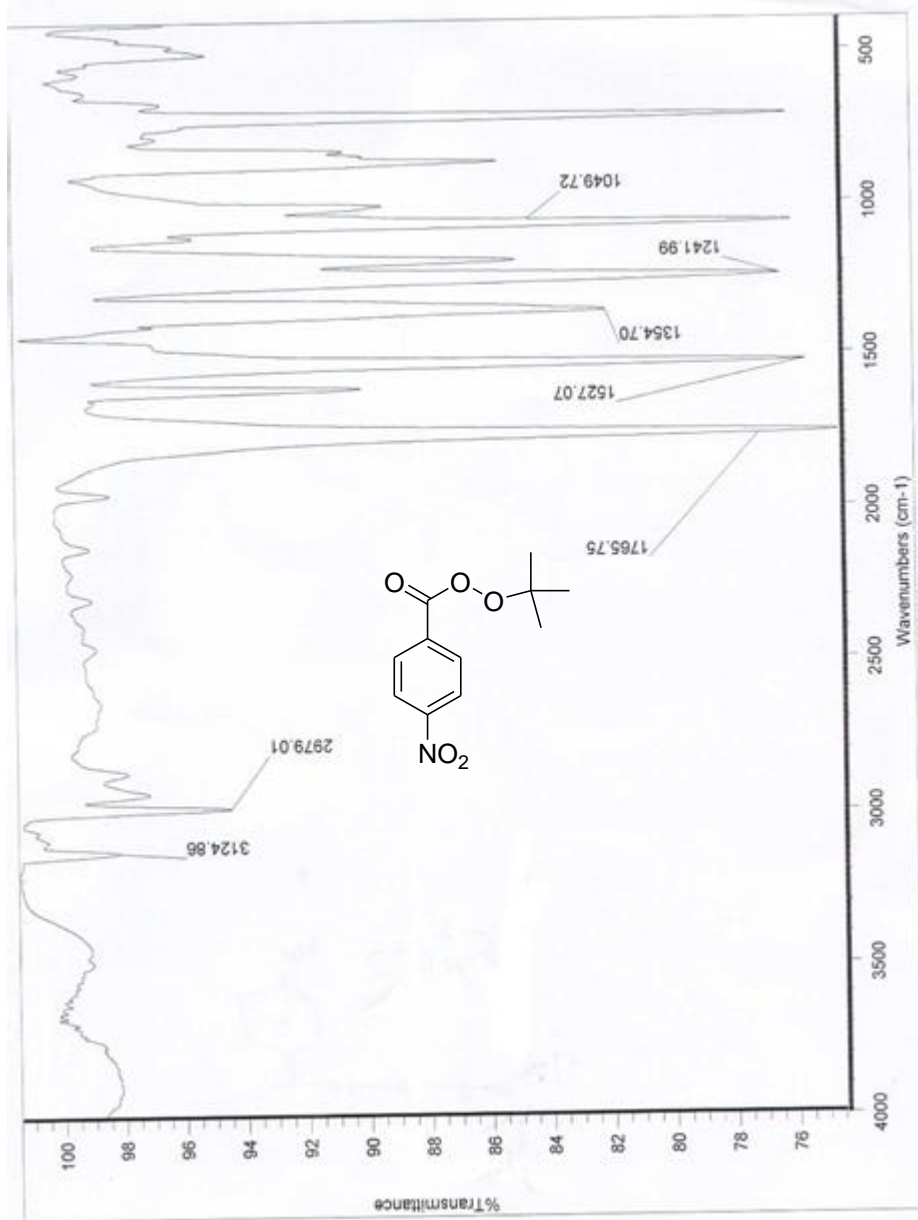

FT-IR of perester (1)

<sup>1</sup>H NMR

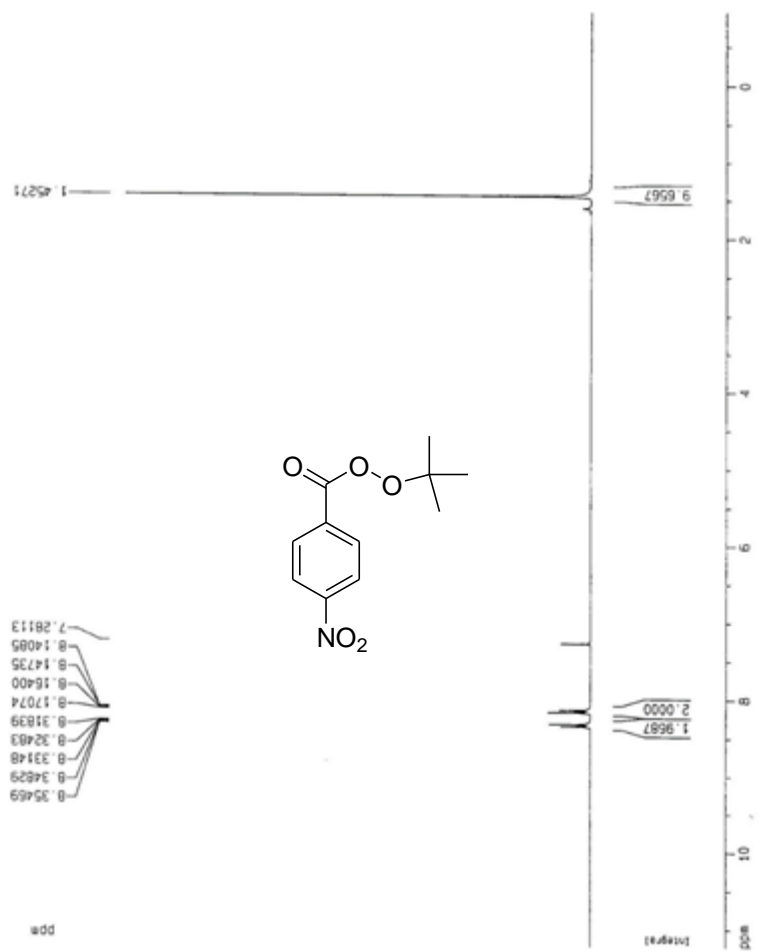



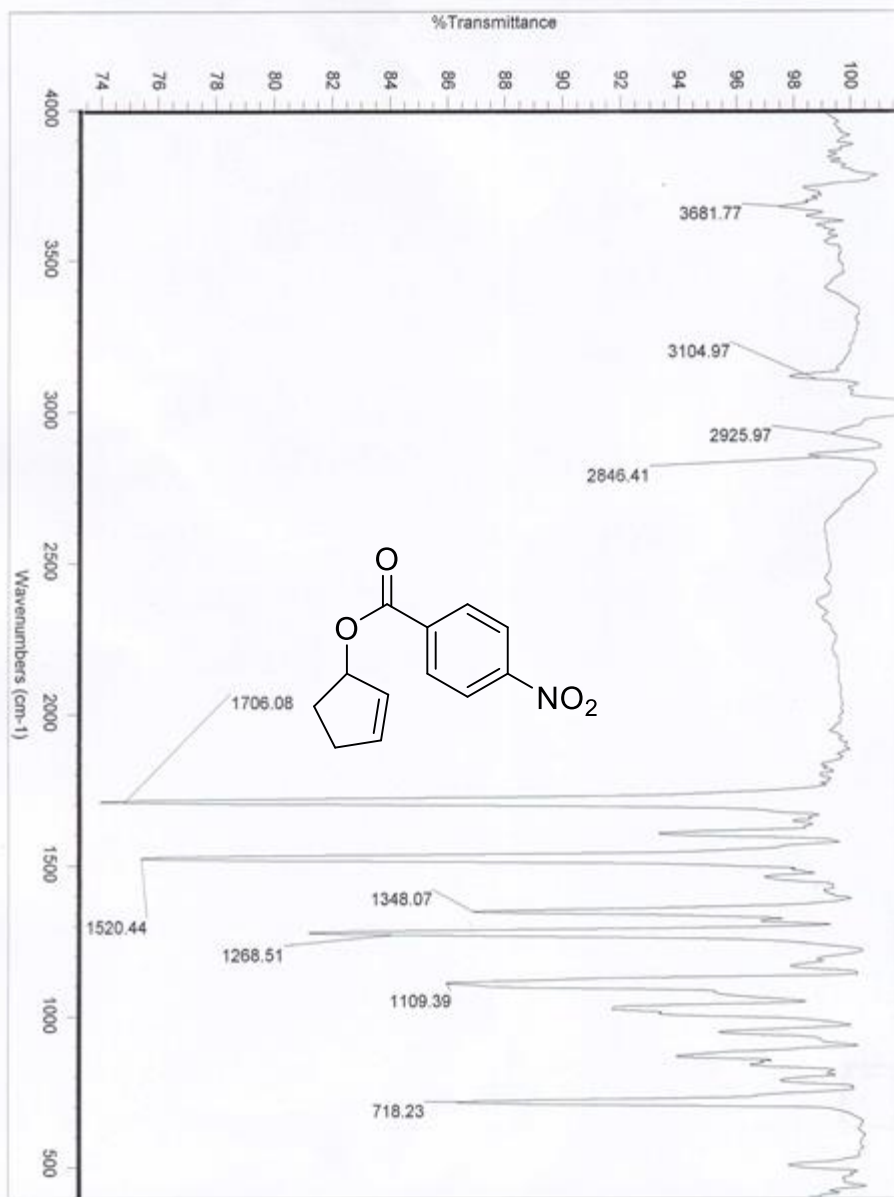

FT-IR of compound 2

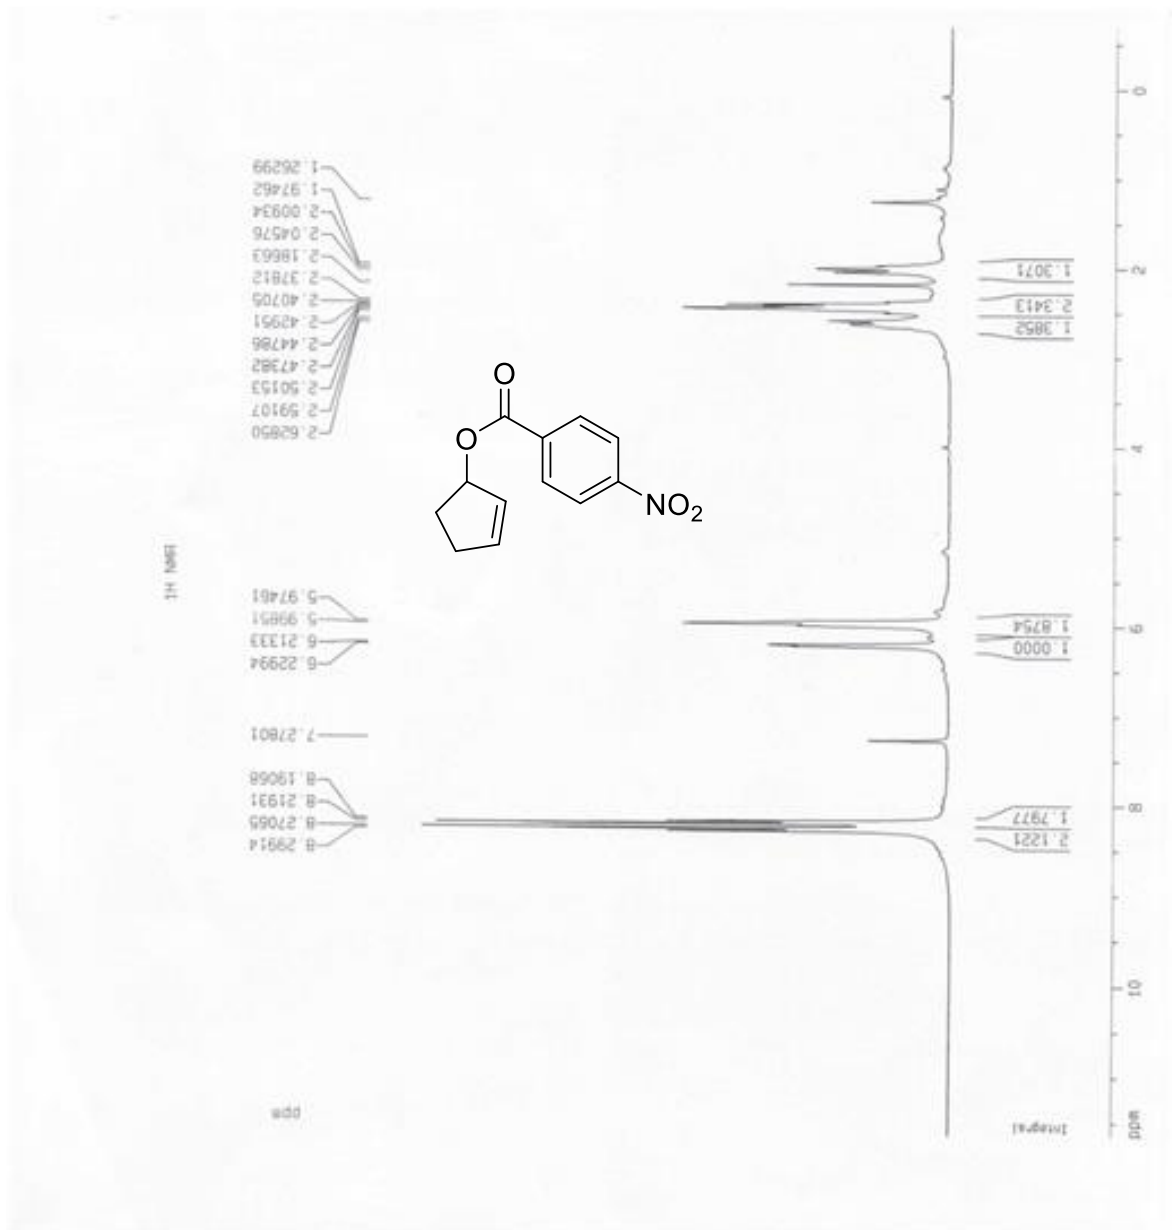

<sup>1</sup>H NMR of compound 2

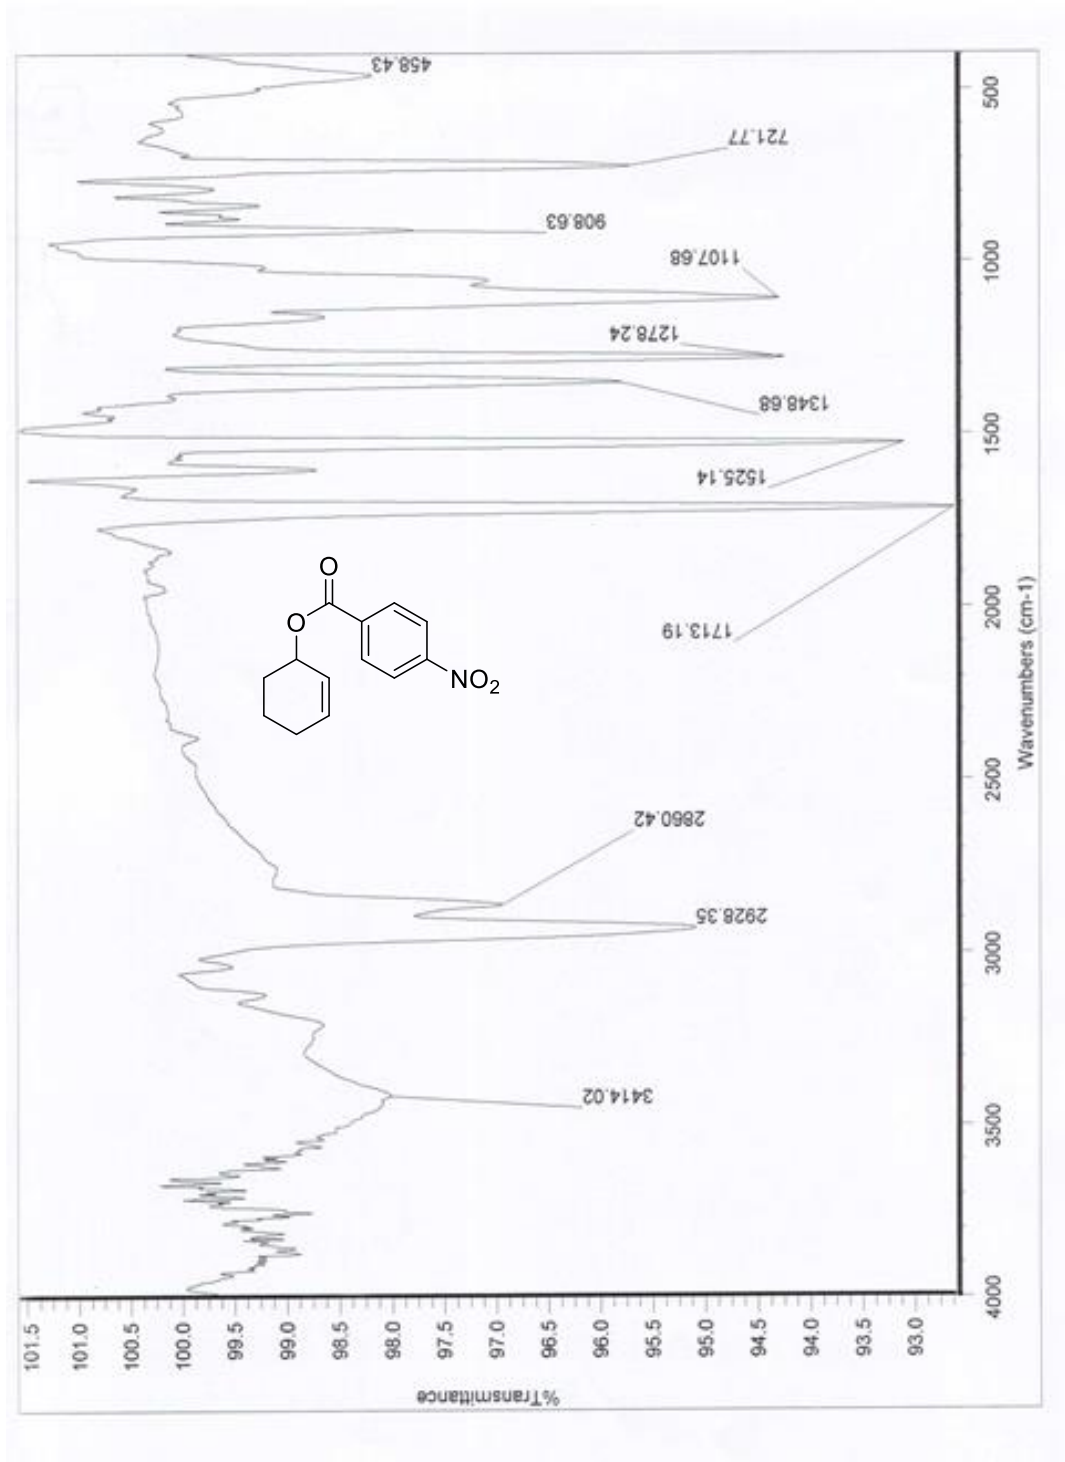

FT-IR of compound 3

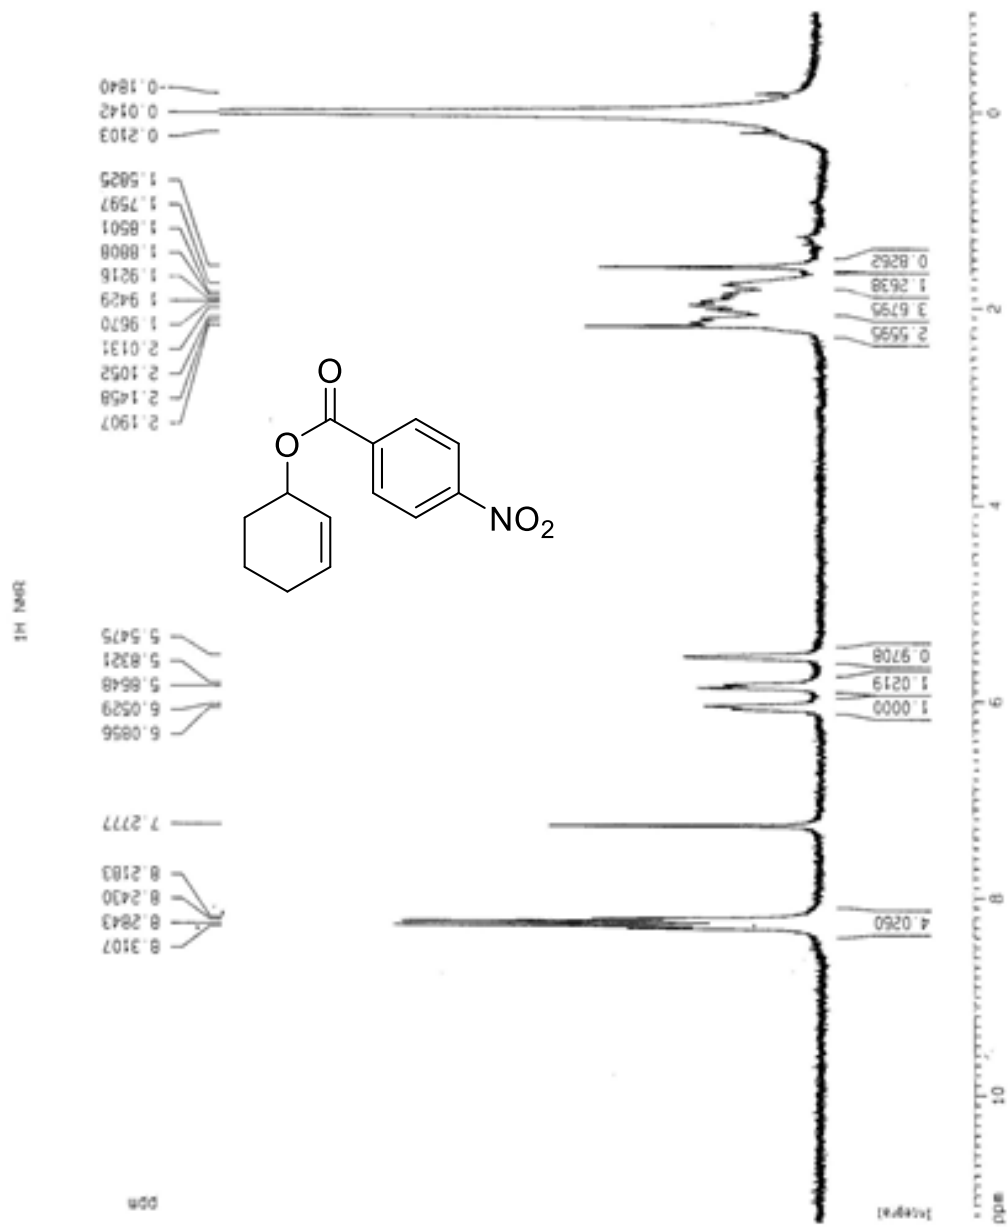

<sup>1</sup>H NMR of compound 3

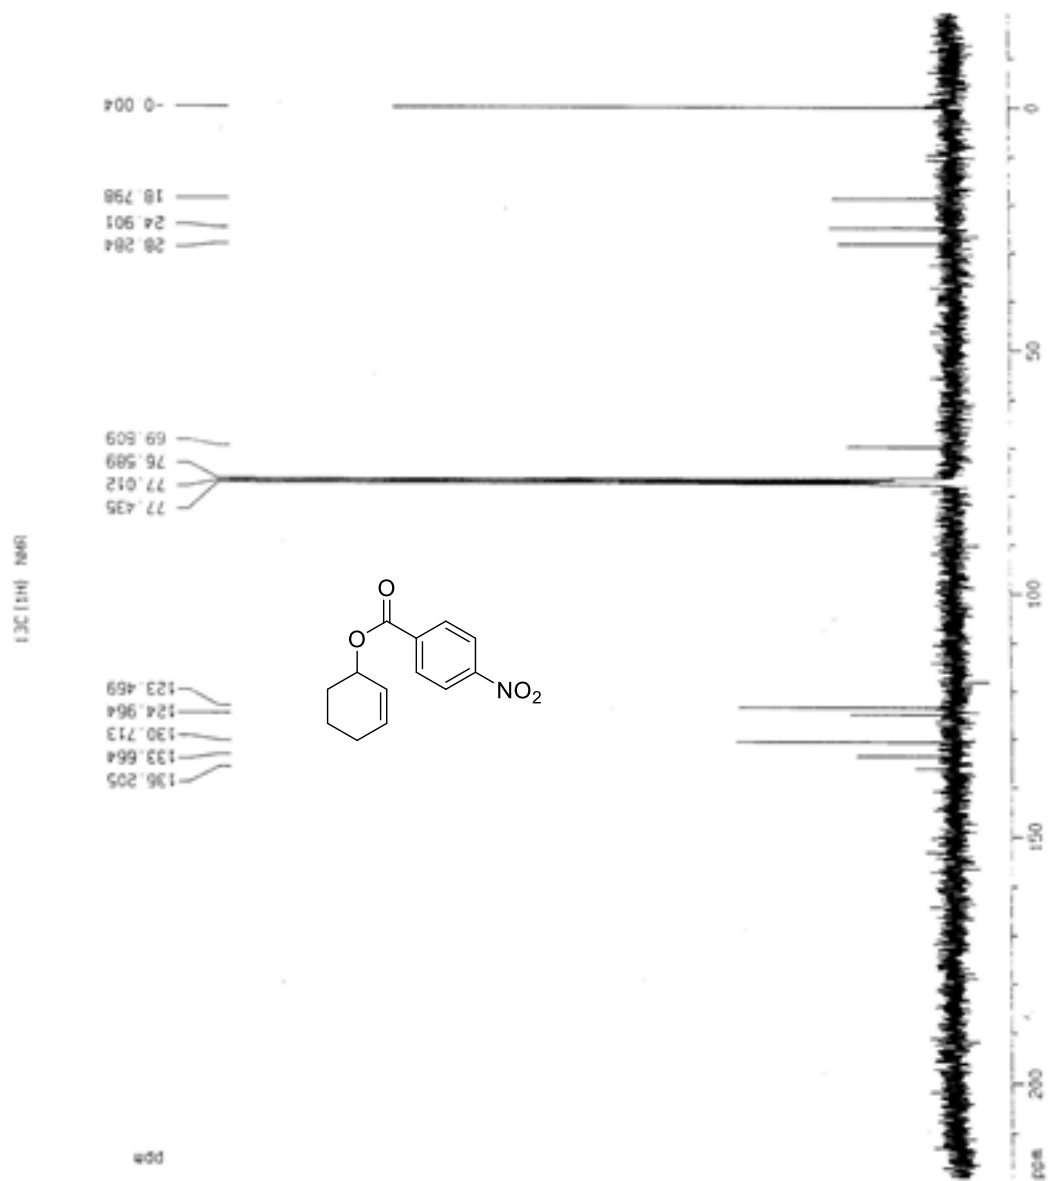

<sup>13</sup>C NMR of compound 3

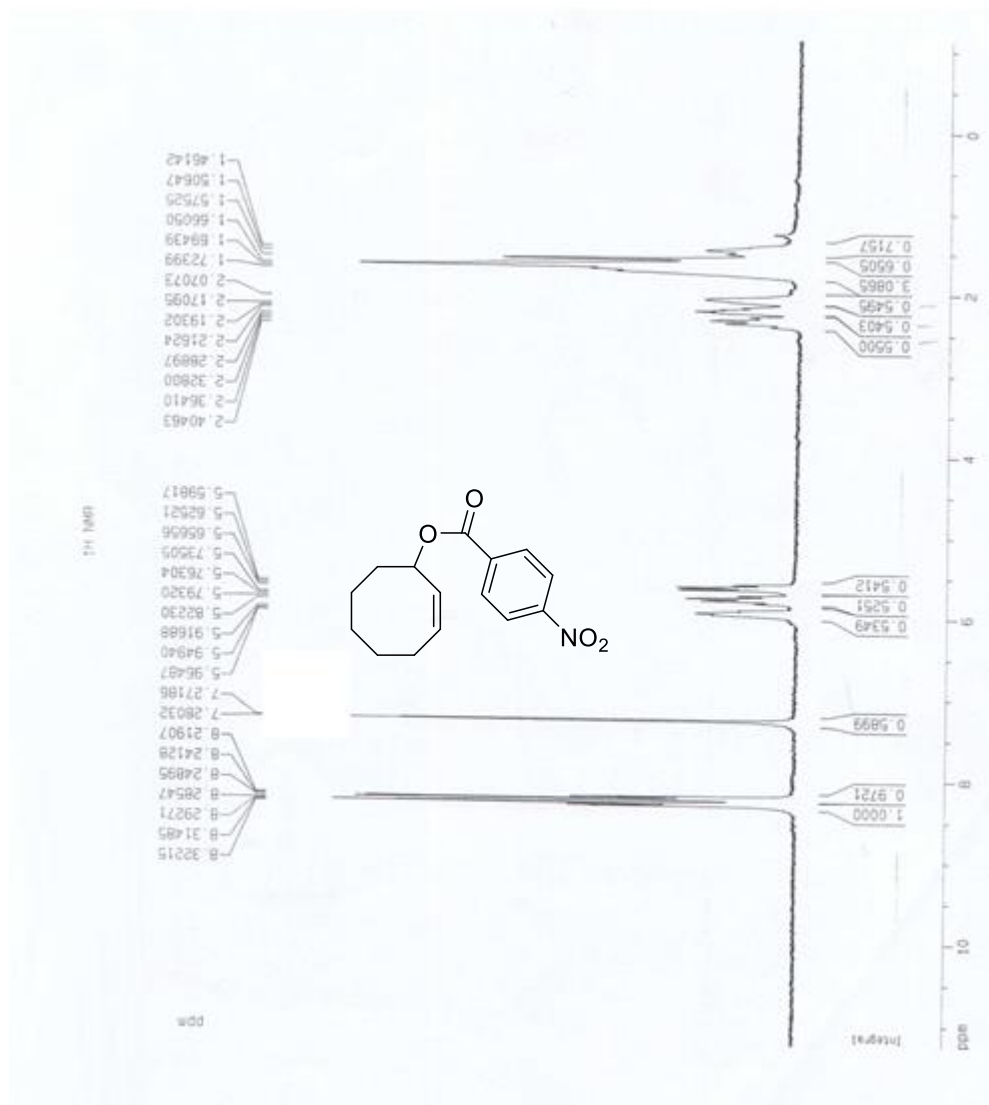

<sup>13</sup>C NMR of compound 4

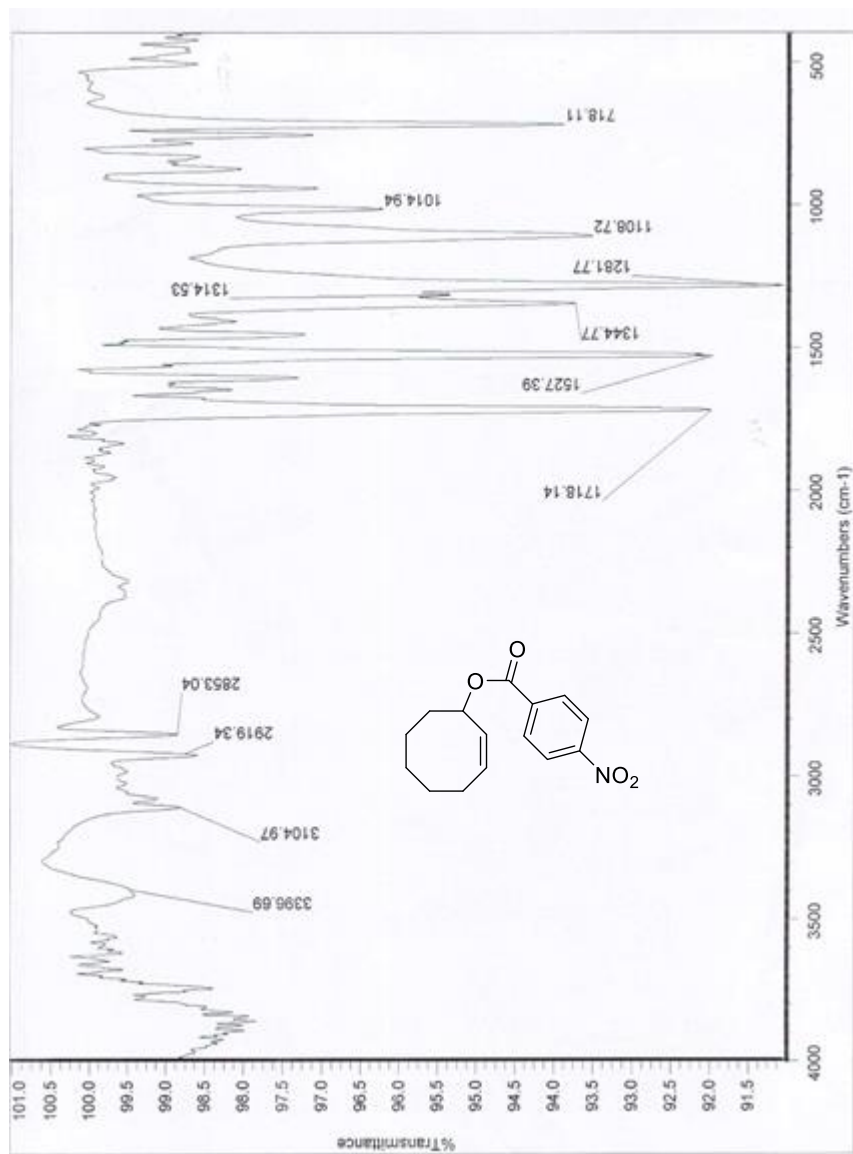

FT-IR of compound 4

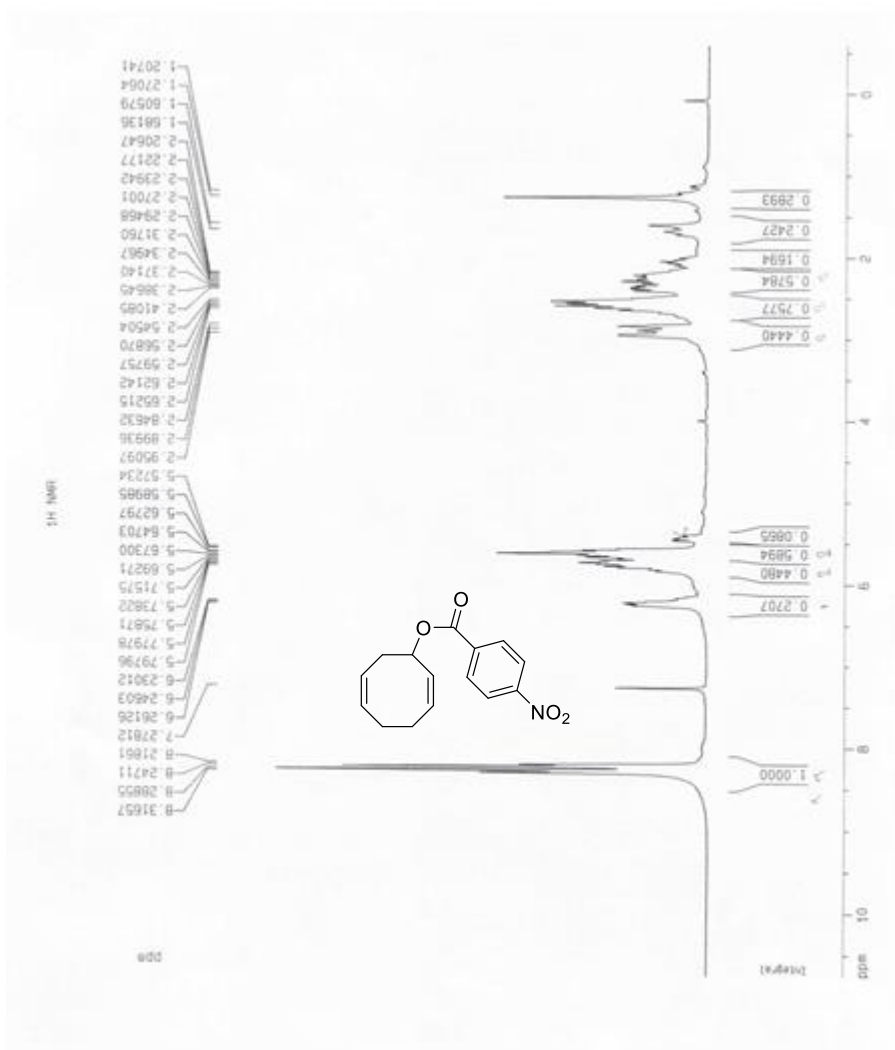

<sup>1</sup>H NMR of compound 5



## References

- 1 D. Z hao, J. Feng, Q. Huo, N. Malosh, G. H. Fredrickson, B. F. Chmelka, G. D. Stucky, *Science*, 1998, **279**, 548-552
- 2 X. Zhang, E. Sau Man Lai, R. Martin-Aranda, K.L. Yeung, *Appl. Catal. A: Gen.*, 2004, **261**, 109-118.
- 3 S. Samadi, S. Nazari, H. Arvinnezhad, K. Jadidi, B. Notash, *Tetrahedron* 2013, **69**, 6679-6686.
- 4 S. Samadi, K.Jadidi, B. Khanmohammadi N. Tavakoli, *J. Catal.* 2016, **340**, 344-353.
